# Supplementary material
Source: HighWire-hosted journal article supplement (https://bmjopen.bmj.com/content/7/10/e016560)
Supplement: inline-supplementary-material-1 [file inline-supplementary-material-1.pdf]

*Supplementary Table 1.* Descriptive information.

| <b>ID</b> | <b>Gender</b> | <b>Trauma<sup>a</sup></b>          | <b>Total # lifetime<br/>traumatic events</b> |
|-----------|---------------|------------------------------------|----------------------------------------------|
| A         | Female        | Violent robbery                    | 5                                            |
| B         | Female        | Sexual assault                     | 3                                            |
| C         | Female        | Witnessed drowning                 | 3                                            |
| D         | Female        | Witnessed brother's beating murder | 6                                            |
| E         | Male          | Violent house robbery              | 6                                            |
| F         | Male          | Shot by friend (accidental)        | 4                                            |
| G         | Male          | Saw friend shot                    | 3                                            |
| H         | Male          | Saw friend shot                    | 2                                            |
| I         | Male          | Witnessed beating murder           | 4                                            |
| J         | Male          | Car crashed through house          | 8                                            |
| K         | Male          | Someone shot in home               | 9                                            |
| L         | Male          | Car accident                       | 6                                            |
| M         | Male          | Physical assault                   | 8                                            |
| N         | Male          | Witnessed friend being stabbed     | 10                                           |
| O         | Male          | Best friend beaten to death        | 6                                            |
| P         | Male          | Witnessed friend's shooting murder | 9                                            |
| Q         | Male          | Witnessed shooting, then murder    | 5                                            |
| R         | Female        | Raped                              | 4                                            |
| S         | Female        | Gang raped                         | 4                                            |
| T         | Female        | Raped                              | 3                                            |
| U         | Female        | Raped                              | 5                                            |
| V         | Female        | Raped                              | 2                                            |

|   |        |                                 |   |
|---|--------|---------------------------------|---|
| W | Female | Raped                           | 8 |
| X | Female | House fire                      | 2 |
| Y | Female | House fire (family member died) | 7 |

---

<sup>a</sup> Note, 'Trauma' identifies the event the young person marked as most upsetting to them *now*.

It is not necessarily the most recent traumatic event. Index events had occurred between 2013 and 2016. All had experienced multiple traumatic events and in most interviews the young person would discuss other events, along with the index trauma.
